# Supplementary material for: Antioxidant Activity and Inhibition of Liver Cancer Cells’ Growth of Extracts from 14 Marine Macroalgae Species of the Mediterranean Sea
Source: MDPI journal article supplement (doi:10.3390/foods12061310), 2023-03-19
Supplement: s1 [file s1]

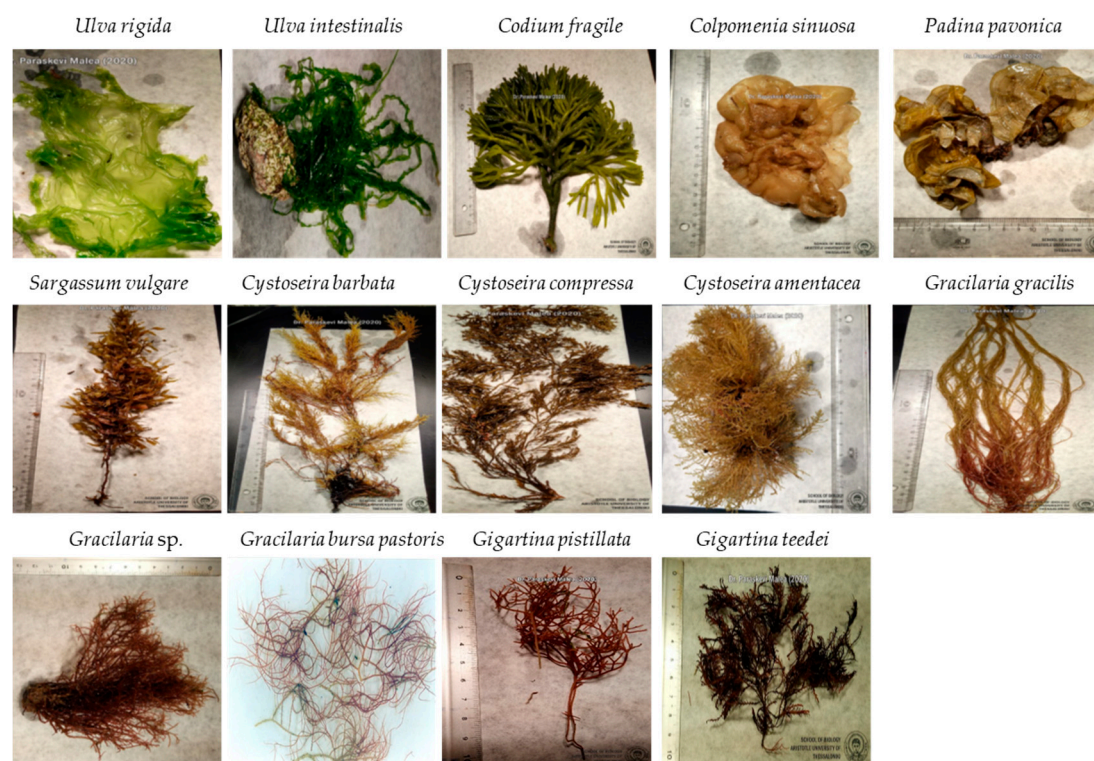

**Figure S2.** Photos of the tested macroalgae. Chlorophyta: *U. rigida*, *U. intestinalis*, *C. fragile*; Phaeophyceae: *C. sinuosa*, *P. pavonica*, *S. vulgare*, *C. barbata*, *C. compressa*, *C. amentacea*; Rhodophyta: *G. gracilis*, *G. sp.*, *G. bursa pastoris*, *G. pistillata*, *G. teedei*.
