# Supplementary material for: Antioxidant Activity and Inhibition of Liver Cancer Cells’ Growth of Extracts from 14 Marine Macroalgae Species of the Mediterranean Sea
Source: MDPI journal article supplement (doi:10.3390/foods12061310), 2023-03-19
Supplement: s1 [file s1]

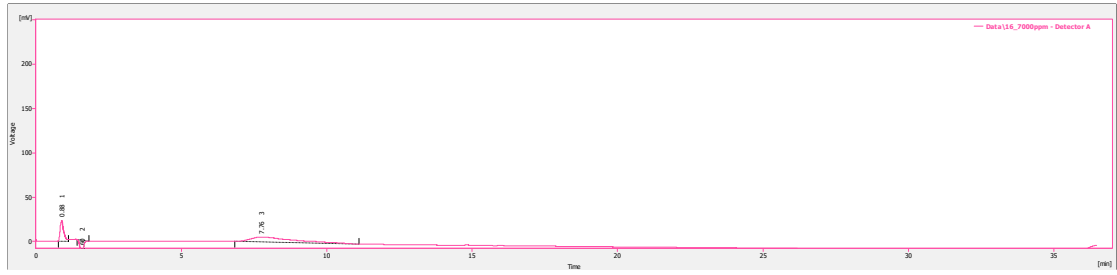

(16)

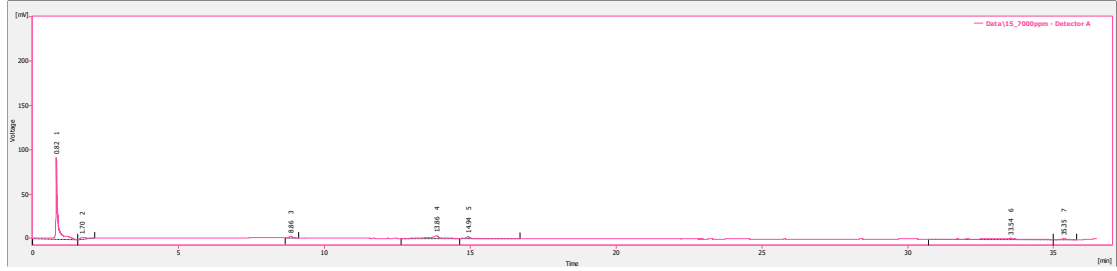

(15)

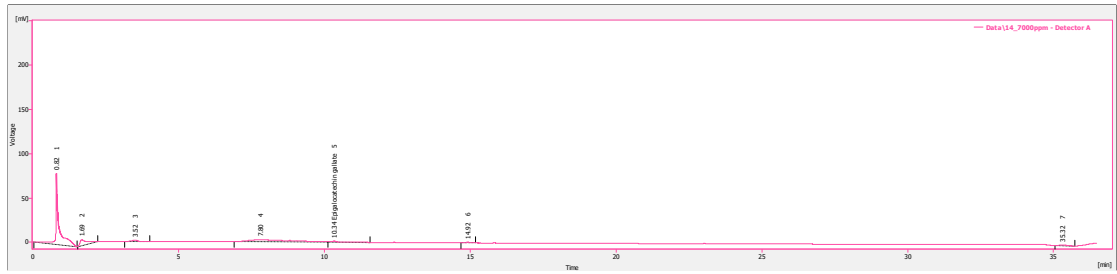

(14)

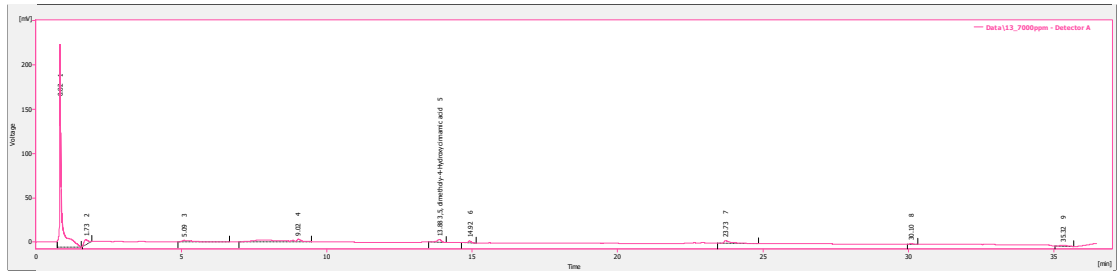

(13)

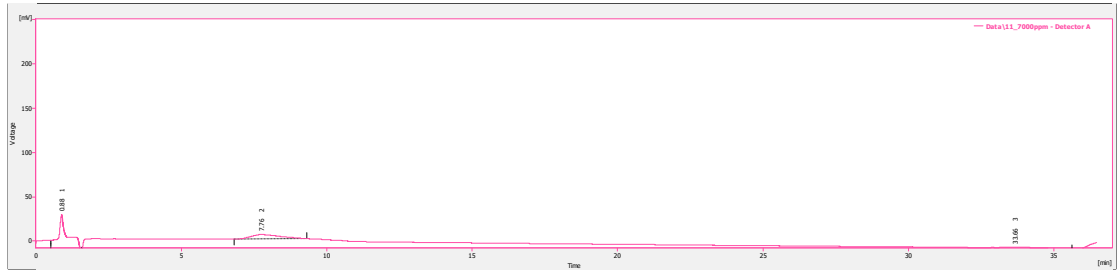

(11)

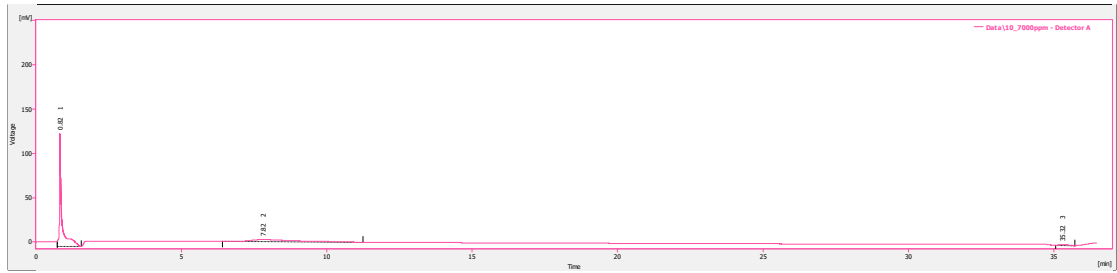

(10)

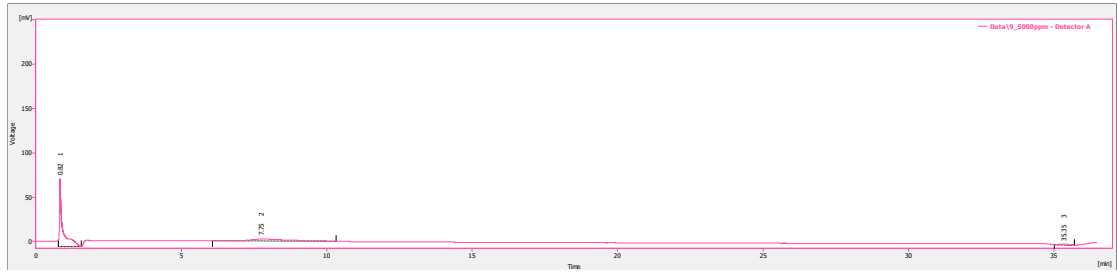

(9)

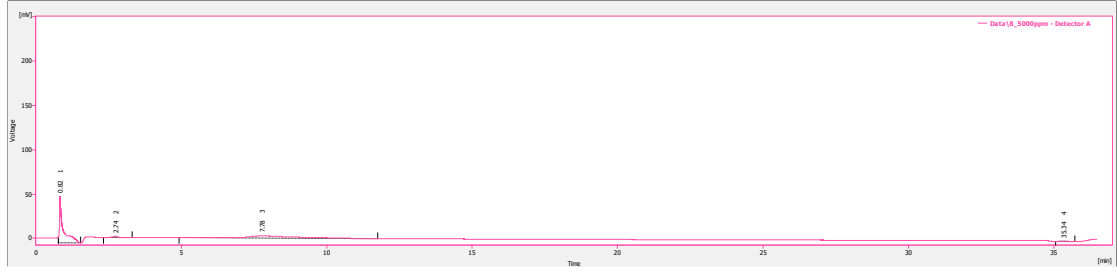

(8)

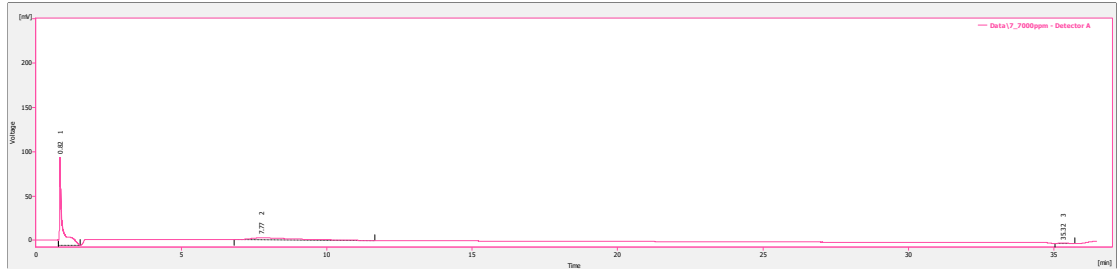

(7)

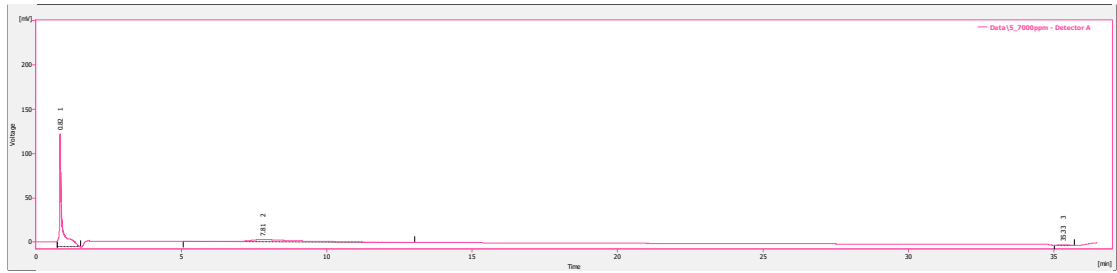

(5)

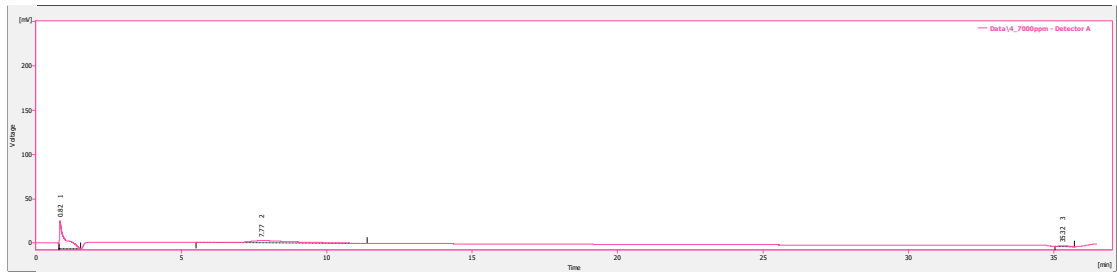

(4)

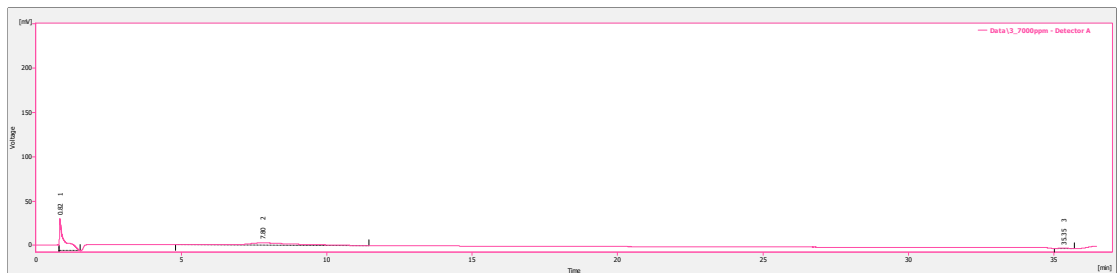

(3)

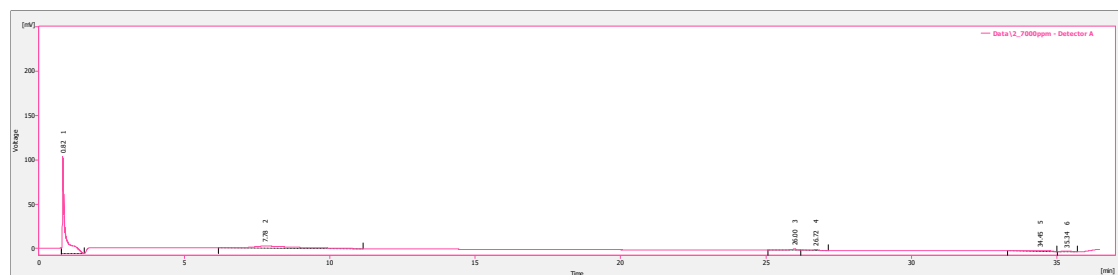

(2)

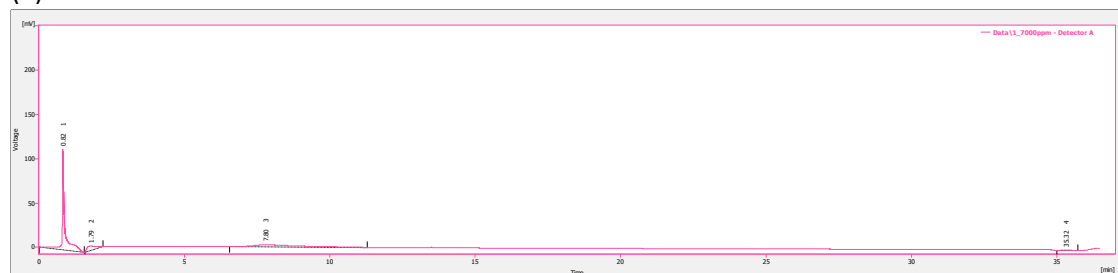

(1)

**Figure S1.** HPLC Chromatograms of macroalgae extracts at 280 nm. (1) *Ulva rigida*, (2) *Gracilaria gracilis*, (3) *Colpomenia sinuosa*, (4) *Codium fragile*, (5) *Cystoseira barbata*, (7) *Cystoseira amentacea*, (8) *Ulva intestinalis*, (9) *Cystoseira compressa*, (10) *Sargasum vulgare*, (11) *Padina pavonica*, (13) *Gigartina teedei*, (14) *Gracilaria* sp, (15) *Gigartina pistillata*, (16) *Gracilaria bursa pastoris*.
